# Supplementary material for: Stress fiber response to mechanics: a free energy dependent statistical model
Source: Royal Society of Chemistry journal article supplement (doi:10.1039/c3sm52914b), 2014-01-01
Supplement: c3sm52914b1.pdf [file c3sm52914b1.pdf]

**Electronic Supplementary Information for Soft Matter manuscript:  
Stress Fiber Response to Mechanics: A Free Energy Dependent Statistical Model**

Li Jiang <sup>a</sup>, Chun Yang<sup>a</sup>, Lei Zhao<sup>b</sup>, and Zheng QS<sup>c</sup>

<sup>a</sup>Institute of Biomechanics and Medical Engineering, Engineering Mechanics Department, School of Aerospace, Tsinghua University, Beijing100084, China

<sup>b</sup>School of Biological Science and Medical Engineering, Beihang University, Xueyuan Road 37, Beijing 100191, China

<sup>c</sup>Center for Nano/micro-Mechanics and Multidisciplinary Innovation Research, Tsinghua University, Beijing 100084, People's Republic of China

**S1**

**The magnitude of the cell contractility in absence of the external strain**

In absence of external strain, the effective free energy is

$$\bar{W} = \left[ \left( \frac{\bar{\sigma}_c}{\bar{E}} - 1 \right)^2 + \left( \frac{1}{\bar{E}} + \frac{1}{\bar{E}_c} \right) \bar{\sigma}_c^2 \right] \quad \backslash * \text{MERGEFORMAT (A1)}$$

The stationary point is then given by the equation  $\left. \frac{\partial \bar{W}}{\partial \bar{\sigma}_c} \right|_{\bar{\sigma}_c = \bar{\sigma}_0} = 0$  as

$$\bar{\sigma}_0 = \frac{1}{\frac{1}{\bar{E}} + \frac{1}{\bar{E}_c} + 1} \quad \backslash * \text{MERGEFORMAT (A2)}$$

Since  $\left. \frac{\partial^2 \bar{W}}{\partial \bar{\sigma}_c^2} \right|_{\bar{\sigma}_c = \bar{\sigma}_0} = \frac{1}{\bar{E}} + \frac{1}{\bar{E}_c} + 1 > 0$ ,  $\bar{W}$  reaches its minimum when  $\bar{\sigma}_c = \bar{\sigma}_0$ . Since

cells moduli are observed as a linear function of substrate elasticity,  $\frac{\bar{E}}{\bar{E}_c}$  is considered as a constant. Under this assumption, the cell contractility increases gradually at first, and then followed by a plateau.

**S2**

**The contractility and alignment of the cell under static uniaxial strain**

Under static uniaxial strain, the effective free energy can be written as

$$\bar{W} = \left( \bar{\varepsilon}_\infty \cos^2 \theta + \frac{\bar{\sigma}_c}{\bar{E}} - 1 \right)^2 + \left( \frac{1}{\bar{E}} + \frac{1}{\bar{E}_{cx}} \right) \bar{\sigma}_c^2 - 2 \bar{\sigma}_c \bar{\varepsilon}_\infty \cos^2 \theta \quad \backslash *$$

MERGEFORMAT (A3)

Cells can adjust both the magnitude,  $\bar{\sigma}_c$ , and the orientation,  $\theta$ , of the contractility, to minimize the free energy  $\bar{W}$ .

We denote the stationary point by solving the equation  $\partial\bar{W}/\partial\bar{\sigma}_c = 0$  as

$$\bar{\sigma}_c = \bar{\sigma}_{static} = \frac{\bar{\varepsilon}_\infty(\bar{E}-1)\cos^2\theta+1}{1+\frac{\bar{E}}{\bar{E}_c}+\frac{1}{\bar{E}}} \quad \backslash* \text{ MERGEFORMAT (A4)}$$

Further derivation shows that  $\frac{\partial^2\bar{W}}{\partial\bar{\sigma}_c^2} = \frac{1}{\bar{E}^2} + \frac{1}{\bar{E}} + \frac{1}{\bar{E}_c} > 0$ , indicating  $\bar{W}(\bar{\sigma}_c, \theta)$  reaches

its minimum when  $\bar{\sigma}_c = \bar{\sigma}_{static}$ . Since the young's modulus  $E$  is smaller than  $\xi$  (~361kPa, see Results) in general, thus  $\bar{E} < 1$ ,  $\bar{\sigma}_{static}$  will decrease while  $\bar{\varepsilon}_\infty$  increases, being self-consistent with the phenomenon of ‘‘tensional homeostasis’’.

Then we get

$$\begin{aligned} \frac{\partial\bar{W}}{\partial\theta} &= 2\bar{\varepsilon}_\infty \sin 2\theta \left( \bar{\sigma}_c - \bar{\varepsilon}_\infty \cos^2\theta - \frac{\bar{\sigma}_c}{\bar{E}} + 1 \right), \\ \frac{\partial^2\bar{W}}{\partial\theta\partial\theta\partial\bar{\sigma}_c} &= 4\bar{\varepsilon}_\infty \cos\theta \sin\theta \left( 1 - \frac{1}{\bar{E}} \right), \\ \frac{\partial^2\bar{W}}{\partial\theta^2} &= 2 \left\{ 2\bar{\varepsilon}_\infty \cos 2\theta \left[ \bar{\sigma}_c - \left( \bar{\varepsilon}_\infty \cos^2\theta + \frac{\bar{\sigma}_c}{\bar{E}} - 1 \right) \right] + \bar{\varepsilon}_\infty^2 \sin^2 2\theta \right\}. \end{aligned} \quad \backslash*$$

MERGEFORMAT (A5)

For convenience, we set that

$$\frac{\partial^2\bar{W}}{\partial\bar{\sigma}_c^2} = A > 0, \quad \frac{\partial^2\bar{W}}{\partial\theta\partial\theta\partial\bar{\sigma}_c} = B, \quad \frac{\partial^2\bar{W}}{\partial\theta^2} = C \quad \backslash* \text{ MERGEFORMAT}$$

(A6)

The steady-state solutions can be given by solving the coupled equations

$$\begin{cases} \frac{\partial\bar{W}}{\partial\theta} = 0, \\ \partial\bar{W}/\partial\bar{\sigma}_c = 0. \end{cases} \quad \backslash* \text{ MERGEFORMAT (A7)}$$

This predicts three possible orientations,  $\theta_{static} = 0, \frac{\pi}{2}, \arccos \sqrt{\frac{(2\bar{E}_c + \bar{E})}{(\bar{E} + 3\bar{E}_c - \bar{E}\bar{E}_c)\bar{\varepsilon}_\infty}}$ .

Among those solutions, a local minimum meets the equations

$$\begin{cases} A > 0, \\ AC - B^2 > 0. \end{cases} \quad \backslash* \text{ MERGEFORMAT (A8)}$$

**Case 1**  $\theta_{static} = 0, \bar{\sigma}_{static} = \bar{\varepsilon}_\infty(\bar{E}-1) + 1 / \left( 1 + \frac{\bar{E}}{\bar{E}_c} + \frac{1}{\bar{E}} \right)$

By substituting  $\theta_{static}$  and  $\bar{\sigma}_{static}$  in Eq. A6, we obtain that

$$A > 0, B = 0, C = \frac{4\bar{\varepsilon}_\infty \bar{E} \left( (\bar{E} + 2\bar{E}_c)(1 - \bar{\varepsilon}_\infty) + \bar{\varepsilon}_\infty \bar{E}_c (\bar{E} - 1) \right)}{\bar{E}^2 + \bar{E}_c \bar{E} + \bar{E}_c}$$

$$\Leftrightarrow C = \frac{4\bar{\varepsilon}_\infty \bar{E} \left( (\bar{E} + 2\bar{E}_c)(1 - \bar{\varepsilon}_\infty) + \bar{\varepsilon}_\infty \bar{E}_c (\bar{E} - 1) \right)}{\bar{E}_c + \bar{E} \bar{E}_c + \bar{E}^2} > 0$$

Thus,  $AC - B^2 > 0$  only if

This implies that parallel alignment may be the stable orientation if  $\bar{E} > 1$  and  $\bar{\varepsilon}_\infty < 1$ .

**Case 2**  $\theta_{static} = \frac{\pi}{2}, \bar{\sigma}_{static} = 1 / \left( 1 + \frac{\bar{E}}{\bar{E}_c} + \frac{1}{\bar{E}} \right)$

In this case,  $A > 0, B = 0, C = -\frac{4\bar{\varepsilon}_\infty \bar{E} (2\bar{E}_c + \bar{E})}{\bar{E}_c + \bar{E} \bar{E}_c + \bar{E}^2} < 0$ , thus  $AC - B^2 < 0$ . This indicates that perpendicular alignment is not a stable orientation.

**Case 3**  $\theta_{static} = \arccos \sqrt{\frac{(2\bar{E}_c + \bar{E})}{(\bar{E} + 3\bar{E}_c - \bar{E} \bar{E}_c) \bar{\varepsilon}_\infty}}$  (only if  $\frac{(2\bar{E}_c + \bar{E})}{(\bar{E} + 3\bar{E}_c - \bar{E} \bar{E}_c) \bar{\varepsilon}_\infty} \in (0, 1)$ ),

$$\bar{\sigma}_{static} = \frac{1}{\frac{1}{\bar{E}_c} + \frac{3}{\bar{E}} - 1}$$

In this case,  $A > 0, C = 2\bar{\varepsilon}_\infty^2 \sin^2 2\theta_{static} > 0, B = 2\bar{\varepsilon}_\infty \sin 2\theta_{static} \left( 1 - \frac{1}{\bar{E}} \right)$ .

By solving the equations  $AC - B^2 > 0$  and  $0 \leq \frac{(2\bar{E}_c + \bar{E})}{(\bar{E} + 3\bar{E}_c - \bar{E} \bar{E}_c) \bar{\varepsilon}_\infty} \leq 1$ , we then get that

$$\frac{4\bar{\varepsilon}_\infty \bar{E} \left( (\bar{E} + 2\bar{E}_c)(1 - \bar{\varepsilon}_\infty) + \bar{\varepsilon}_\infty \bar{E}_c (\bar{E} - 1) \right)}{\bar{E}_c + \bar{E} \bar{E}_c + \bar{E}^2} < 0 \quad \cdot *$$

MERGEFORMAT (A8)

This implies that most cells may align in the direction of

$$\theta_{static} = \arccos \sqrt{\frac{(2\bar{E}_c + \bar{E})}{(\bar{E} + 3\bar{E}_c - \bar{E} \bar{E}_c) \bar{\varepsilon}_\infty}} \text{ if } \bar{E} < 1 \text{ and } \bar{\varepsilon}_\infty > 1.$$

Above all, parallel orientation or  $\theta_{static} = \arccos \sqrt{\frac{(2\bar{E}_c + \bar{E})}{(\bar{E} + 3\bar{E}_c - \bar{E} \bar{E}_c) \bar{\varepsilon}_\infty}}$  is the stable

orientation under static uniaxial strain, dependent on the magnitude of  $\bar{E}$  and  $\bar{\varepsilon}_\infty$ .

Notably,  $\bar{E}$  and  $\bar{\varepsilon}_\infty$  are very close to 1, which makes  $\theta_{static} = \arccos \frac{(2\bar{E}_c + \bar{E})}{(\bar{E} + 3\bar{E}_c - \bar{E}\bar{E}_c)\bar{\varepsilon}_\infty}$  is very close to zero.

### S3

#### Cells alignment is guided by the magnitude and direction of cyclic uniaxial strain

Under cyclic uniaxial strain, the effective free energy averaged in one period is

$$\bar{W} = \left[ (\bar{\varepsilon}_0 \cos^2 \theta + \frac{\bar{\sigma}_c}{\bar{E}} - 1)^2 + \left( \frac{1}{\bar{E}} + \frac{1}{\bar{E}_c} \right) \bar{\sigma}_c^2 - 2\bar{\sigma}_c \bar{\varepsilon}_0 \cos^2 \theta \right] + \frac{1}{2} (\bar{\varepsilon}_0 \cos^2 \theta)^2 \quad \backslash*$$

MERGEFORMAT (A8)

The stationary point is given by solving  $\partial \bar{W} / \partial \bar{\sigma}_c = 0$  as

$$\bar{\sigma}_{cyclic} = \frac{\bar{\varepsilon}_\infty (\bar{E} - 1) \cos^2 \theta + 1}{1 + \frac{\bar{E}}{\bar{E}_c} + \frac{1}{\bar{E}}} \quad \backslash* \text{ MERGEFORMAT (A8)}$$

Further derivation shows that  $\frac{\partial^2 \bar{W}}{\partial \bar{\sigma}_c^2} = \frac{1}{\bar{E}^2} + \frac{1}{\bar{E}} + \frac{1}{\bar{E}_c} > 0$ , indicating  $\bar{W}(\bar{\sigma}_c, \theta)$  reaches

its minimum when  $\bar{\sigma}_c = \bar{\sigma}_{cyclic}$ .

We then get

$$\begin{aligned} \frac{\partial \bar{W}}{\partial \theta} &= \bar{\varepsilon}_\infty \sin 2\theta \left[ 2\bar{\sigma}_c \left( 1 - \frac{1}{\bar{E}} \right) + 2 - 3\bar{\varepsilon}_\infty \cos^2 \theta \right], \\ \frac{\partial^2 \bar{W}}{\partial \theta \partial \bar{\sigma}_c} &= 4\bar{\varepsilon}_\infty \cos \theta \sin \theta \left( 1 - \frac{1}{\bar{E}} \right), \\ \frac{\partial^2 \bar{W}}{\partial \theta^2} &= 2\bar{\varepsilon}_\infty \left\{ \cos 2\theta \left[ 2 \left( \bar{\sigma}_c - \frac{\bar{\sigma}_c}{\bar{E}} + 1 \right) - 3\bar{\varepsilon}_\infty \cos^2 \theta \right] + \frac{3}{2} \bar{\varepsilon}_\infty \sin^2 2\theta \right\}. \quad \backslash* \end{aligned}$$

MERGEFORMAT (A9)

Similar as described above, three stationary points can be derived from Eq. A7:

$$\theta_{cyclic} = 0, \quad \bar{\sigma}_{cyclic} = \bar{\varepsilon}_\infty (\bar{E} - 1) + 1 / \left( 1 + \frac{\bar{E}}{\bar{E}_c} + \frac{1}{\bar{E}} \right)$$

#### Case 1

By substituting  $\theta_{static}$  and  $\bar{\sigma}_{static}$  in Eq. A6, we obtain that  $A > 0$ ,  $B = 0$ ,

$$C = \frac{2\bar{\varepsilon}_\infty \left[ 2\bar{E} (2\bar{E}_c + \bar{E}) (2 - 3\bar{\varepsilon}_\infty) + \bar{\varepsilon}_\infty \bar{E}_c (2\bar{E} + 1) (\bar{E} - 1) \right]}{\bar{E}_c + \bar{E}\bar{E}_c + \bar{E}^2}. \quad AC - B^2 > 0 \quad \text{requires}$$

$$C = \frac{2\bar{\varepsilon}_\infty \left[ 2\bar{E} (2\bar{E}_c + \bar{E}) (2 - 3\bar{\varepsilon}_\infty) + \bar{\varepsilon}_\infty \bar{E}_c (2\bar{E} + 1) (\bar{E} - 1) \right]}{\bar{E}_c + \bar{E}\bar{E}_c + \bar{E}^2} > 0, \text{ denoting that } \bar{E} > 1$$

and  $\bar{\varepsilon}_\infty < \frac{2}{3}$  is one of the solutions. This implies that parallel alignment may dominate when the substrate is stiffer than the cell and the magnitude of the external cyclic strain is small.

$$\theta_{cyclic} = \frac{\pi}{2}, \quad \bar{\sigma}_{cyclic} = \frac{1}{1 + \frac{1}{\bar{E}_c} + \frac{1}{\bar{E}}}$$

**Case 2**

Then  $A > 0$ ,  $B = 0$ ,  $C = -\frac{4\bar{\varepsilon}_\infty \bar{E} (2\bar{E}_c + \bar{E})}{\bar{E}_c + \bar{E}\bar{E}_c + \bar{E}^2} < 0$ , which means that  $AC - B^2 < 0$ . This indicates that perpendicular alignment is not a stable orientation.

**Case 3**  $\theta_{cyclic} = \arccos \sqrt{\frac{2\bar{E} (\bar{E} + 2\bar{E}_c)}{\bar{\varepsilon}_\infty (7\bar{E}\bar{E}_c + 3\bar{E}^2 + \bar{E}_c - 2\bar{E}^2\bar{E}_c)}}$  (only if

$$\frac{2\bar{E} (\bar{E} + 2\bar{E}_c)}{\bar{\varepsilon}_\infty (7\bar{E}\bar{E}_c + 3\bar{E}^2 + \bar{E}_c - 2\bar{E}^2\bar{E}_c)} \in (0, 1), \quad \bar{\sigma}_{cyclic} = \frac{\bar{E}_c \bar{E} (1 + 2\bar{E})}{7\bar{E}\bar{E}_c + 3\bar{E}^2 + \bar{E}_c - 2\bar{E}^2\bar{E}_c}$$

Then we obtain  $A > 0$ ,  $B = 2\bar{\varepsilon}_\infty \sin 2\theta \left(1 - \frac{1}{\bar{E}}\right)$ ,  $C = 3\bar{\varepsilon}_\infty^2 \sin^2 2\theta$ .

Solving the coupled equations  $AC - B^2 > 0$  and  $0 < \frac{2\bar{E} (\bar{E} + 2\bar{E}_c)}{\bar{\varepsilon}_\infty (7\bar{E}\bar{E}_c + 3\bar{E}^2 + \bar{E}_c - 2\bar{E}^2\bar{E}_c)} < 1$ ,

we then get  $\frac{2\bar{\varepsilon}_\infty \left[ 2\bar{E} (2\bar{E}_c + \bar{E}) (2 - 3\bar{\varepsilon}_\infty) + \bar{\varepsilon}_\infty \bar{E}_c (2\bar{E} + 1) (\bar{E} - 1) \right]}{\bar{E}_c + \bar{E}\bar{E}_c + \bar{E}^2} < 0$ .  $\bar{E} < 1$  and

$\bar{\varepsilon}_\infty > \frac{2}{3}$  is one of the solutions. This suggests that

$\theta_{cyclic} = \arccos \sqrt{\frac{2\bar{E} (\bar{E} + 2\bar{E}_c)}{\bar{\varepsilon}_\infty (7\bar{E}\bar{E}_c + 3\bar{E}^2 + \bar{E}_c - 2\bar{E}^2\bar{E}_c)}}$  will be a local minimum of the effective free energy when the substrate is softer than the cell and the magnitude of the external

cyclic strain is large. Notably, if  $\bar{E} = 1$  and  $\bar{\varepsilon}_\infty ? \frac{2}{3}$ ,

$\arccos \sqrt{\frac{2\bar{E} (\bar{E} + 2\bar{E}_c)}{\bar{\varepsilon}_\infty (7\bar{E}\bar{E}_c + 3\bar{E}^2 + \bar{E}_c - 2\bar{E}^2\bar{E}_c)}}$  will be very close to  $\frac{\pi}{2}$ .

In conclusion, parallel orientation or  $\theta_{cyclic} = \arccos \sqrt{\frac{2\bar{E}(\bar{E} + 2\bar{E}_c)}{\bar{\varepsilon}_\infty(7\bar{E}\bar{E}_c + 3\bar{E}^2 + \bar{E}_c - 2\bar{E}^2\bar{E}_c)}}$  will be the stable orientation under static uniaxial strain, dependent on the magnitude of  $\bar{E}$

and  $\bar{\varepsilon}_\infty$ . Cells are more likely to align parallel to uniaxial cyclic strain when  $\bar{\varepsilon}_\infty < \frac{2}{3}$ ,

while in the direction of  $\theta_{cyclic} = \arccos \sqrt{\frac{2\bar{E}(\bar{E} + 2\bar{E}_c)}{\bar{\varepsilon}_\infty(7\bar{E}\bar{E}_c + 3\bar{E}^2 + \bar{E}_c - 2\bar{E}^2\bar{E}_c)}}$  when  $\bar{\varepsilon}_\infty > \frac{2}{3}$ , indicating that varying the magnitude of external cyclic strain will result in different

cells orientations. In addition,  $\theta_{cyclic} = \arccos \sqrt{\frac{2\bar{E}(\bar{E} + 2\bar{E}_c)}{\bar{\varepsilon}_\infty(7\bar{E}\bar{E}_c + 3\bar{E}^2 + \bar{E}_c - 2\bar{E}^2\bar{E}_c)}}$  will shift

towards  $\frac{\pi}{2}$  along with the growth of  $\bar{\varepsilon}_\infty$ .

#### S4

#### Drugs-tuned contractility impacts on cell alignment under cyclic uniaxial strain

The effective free energy averaged in one period is

$$\bar{W} = \left[ (\bar{\varepsilon}_0 \cos^2 \theta + \frac{\bar{\sigma}_c}{\bar{E}} - 1)^2 + \left( \frac{1}{\bar{E}} + \frac{1}{\bar{E}_c} \right) \bar{\sigma}_c^2 - 2\bar{\sigma}_c \bar{\varepsilon}_0 \cos^2 \theta \right] + \frac{1}{2} (\bar{\varepsilon}_0 \cos^2 \theta)^2$$

As  $\bar{\sigma}_c$  is dominated by drugs and regarded as a constant, the minimum of  $\bar{W}$  is achieved when

$$\partial \bar{W} / \partial \theta = \bar{\varepsilon}_\infty \sin 2\theta \left[ 2\bar{\sigma}_c \left( 1 - \frac{1}{\bar{E}} \right) + 2 - 3\bar{\varepsilon}_\infty \cos^2 \theta \right] = 0, \quad \backslash *$$

MERGEFORMAT (A10)

$$\frac{\partial^2 \bar{W}}{\partial \theta^2} = 2\bar{\varepsilon}_\infty \left\{ \cos 2\theta \left[ 2 \left( \bar{\sigma}_c - \frac{\bar{\sigma}_c}{\bar{E}} + 1 \right) - 3\bar{\varepsilon}_\infty \cos^2 \theta \right] + \frac{3}{2} \bar{\varepsilon}_\infty \sin^2 2\theta \right\} > 0. \quad \backslash *$$

MERGEFORMAT (A11)

Three stationary points can be solved from the Eq. A10:

**Case 1**  $\theta_{drug} = 0$

By substituting  $\theta_{drug} = 0$  in Eq. A11, we then get  $\bar{E} > 1$  and  $\bar{\varepsilon}_\infty < \frac{2}{3}$  is one of the

solutions for the equation  $\frac{\partial^2 \bar{W}}{\partial \theta^2} = 2\bar{\varepsilon}_\infty \left[ 2\bar{\sigma}_c \left( 1 - \frac{1}{\bar{E}} \right) + (2 - 3\bar{\varepsilon}_\infty) \right] > 0$ . This implies that

parallel alignment will locally minimize the effective free energy when the substrate is stiffer than the cells and the magnitude of the external cyclic strain is small.

**Case 2**  $\theta_{drug} = \frac{\pi}{2}$

In this case,  $\frac{\partial^2 \bar{W}}{\partial \theta^2} = -4\bar{\varepsilon}_\infty \left[ \bar{\sigma}_c \left( 1 - \frac{1}{\bar{E}} \right) + 1 \right]$ . Thus  $\bar{E} = 1$  and  $\bar{\sigma}_c > \frac{1}{\bar{E} - 1}$  is one of the

solutions for  $\frac{\partial^2 \bar{W}}{\partial \theta^2} > 0$ . This suggests that perpendicular alignment will be a local minimum of free energy when the substrate is softer than the cell and the contractile stress is relatively large.

**Case 3**  $\theta_{drug} = \arccos \sqrt{\frac{2 \left[ \bar{\sigma}_c \left( 1 - \frac{1}{\bar{E}} \right) + 1 \right]}{3\bar{\varepsilon}_\infty}}$  (only if  $\frac{2 \left[ \bar{\sigma}_c \left( 1 - \frac{1}{\bar{E}} \right) + 1 \right]}{3\bar{\varepsilon}_\infty} \in (0, 1)$ )

In this case,  $\frac{\partial^2 \bar{W}}{\partial \theta^2} = 3\bar{\varepsilon}_\infty^2 \sin^2(2\theta_{drug}) > 0$ , indicating that

$\theta_{drug} = \arccos \sqrt{\frac{2 \left[ \bar{\sigma}_c \left( 1 - \frac{1}{\bar{E}} \right) + 1 \right]}{3\bar{\varepsilon}_\infty}}$  is a local minimum.

In summary,  $\theta_{drug} = 0$ ,  $\frac{\pi}{2}$ , and  $\arccos \sqrt{\frac{2 \left[ \bar{\sigma}_c \left( 1 - \frac{1}{\bar{E}} \right) + 1 \right]}{3\bar{\varepsilon}_\infty}}$  are all possible to

minimize the effective free energy, dependent on the magnitudes of  $\bar{E}$ ,  $\bar{\varepsilon}_\infty$ , and  $\bar{\sigma}_c$ . This explains why cells orientation varies when exposed to contractility-regulating reagents of different concentration.
